# Supplementary material
Source: ML conference proceedings conference paper supplement (https://openaccess.thecvf.com/content/WACV2025/html/Lee_Enhancing_Visual_Classification_WACV_2025_paper.html)
Supplement: Supplementary file 1 [file Lee_Enhancing_Visual_Classification_WACV_2025_supplemental.pdf]

# Supplementary Material for “Enhancing Visual Classification using Comparative Descriptors”

## A. Hyperparameters

As mentioned in our main paper, we utilize two hyperparameters:  $n$  represents the number of similar classes for each class, and  $k$  represents the maximum number of descriptors remaining after filtering. We reveal the hyperparameters used in our experiment in Table A. Note that since the SAT dataset has only 10 classes, each class can have up to 9 similar classes.

|     | IN1k | IN1k-V2 | Caltech | CIFAR | CUB | SAT | Places | Food | Pets | DTD | Flowers | Aircraft | Cars |
|-----|------|---------|---------|-------|-----|-----|--------|------|------|-----|---------|----------|------|
| $n$ | 10   | 10      | 10      | 10    | 10  | 9   | 10     | 10   | 10   | 10  | 10      | 10       | 10   |
| $k$ | 10   | 10      | 10      | 20    | 5   | 10  | 15     | 20   | 20   | 5   | 5       | 15       | 15   |

Table A. Hyperparameters used for each dataset in our experiments.

## B. Image Classification With Additional Backbones

We conduct additional experiments using ViT-L/14 and ResNet50 to further demonstrate the robustness of our method across different model architectures and configurations, complementing the ViT-B/32 used in the main paper. These results indicate the consistent performance and adaptability of our approach regardless of the underlying model. The results are presented in Table B and Table C, showing that our approach consistently outperforms existing methods.

| ViT-L/14         | IN1k  | IN1k-V2 | Caltech | CIFAR | CUB   | SAT   | Places | Food  | Pets  | DTD   | Flowers | Aircraft | Cars  | Avg   |
|------------------|-------|---------|---------|-------|-------|-------|--------|-------|-------|-------|---------|----------|-------|-------|
| CLIP             | 73.36 | 67.92   | 87.05   | 77.17 | 62.32 | 56.05 | 40.45  | 92.55 | 93.30 | 52.87 | 74.73   | 44.91    | 76.50 | 69.17 |
| DCLIP            | 75.92 | 70.00   | 89.89   | 78.84 | 65.33 | 63.19 | 42.84  | 93.39 | 93.57 | 54.95 | 78.68   | 49.80    | 76.32 | 71.75 |
| WaffleCLIP       | 75.36 | 69.55   | 90.00   | 79.04 | 64.19 | 60.60 | 42.19  | 93.09 | 91.79 | 53.72 | 76.35   | 48.91    | 76.68 | 70.88 |
| Ours             | 76.04 | 70.48   | 90.69   | 79.71 | 65.77 | 62.07 | 43.83  | 93.54 | 94.55 | 57.87 | 79.15   | 51.07    | 76.69 | 72.42 |
| Ours + Filtering | 76.77 | 70.59   | 91.45   | 79.80 | 63.76 | 62.80 | 44.00  | 93.42 | 93.79 | 62.83 | 80.54   | 50.34    | 75.82 | 72.76 |

Table B. Image classification accuracy (%) with ViT-L/14.

| RN50             | IN1k  | IN1k-V2 | Caltech | CIFAR | CUB   | SAT   | Places | Food  | Pets  | DTD   | Flowers | Aircraft | Cars  | Avg   |
|------------------|-------|---------|---------|-------|-------|-------|--------|-------|-------|-------|---------|----------|-------|-------|
| CLIP             | 58.15 | 51.37   | 75.96   | 42.07 | 45.29 | 28.12 | 36.70  | 78.38 | 83.70 | 38.62 | 61.34   | 21.21    | 54.00 | 51.92 |
| DCLIP            | 60.56 | 53.28   | 79.99   | 43.32 | 49.09 | 30.19 | 39.75  | 79.15 | 84.33 | 41.97 | 66.95   | 22.86    | 53.76 | 54.25 |
| WaffleCLIP       | 60.22 | 53.04   | 78.94   | 43.50 | 47.60 | 30.69 | 38.24  | 79.36 | 84.08 | 39.34 | 65.11   | 23.60    | 53.61 | 53.64 |
| Ours             | 60.83 | 53.26   | 80.14   | 44.02 | 48.93 | 34.19 | 40.38  | 79.85 | 86.29 | 43.40 | 67.25   | 24.36    | 54.32 | 55.17 |
| Ours + Filtering | 61.71 | 53.79   | 81.78   | 44.00 | 49.24 | 34.51 | 40.56  | 80.67 | 84.90 | 49.53 | 69.33   | 24.61    | 53.43 | 56.00 |

Table C. Image classification accuracy (%) with ResNet50.

## C. Evaluation of Descriptor Quality through Question-Answering Task

To assess the quality of descriptors generated by our method, we conduct a question-answering (QA) task using LLaMA-3.1-Instruct, an open-source language model. For each class, we input its descriptor alongside three similar classes and ask the model to identify the best match. All hyperparameters remain at their default values. To ensure accurate results, we repeat the experiment five times and present the average outcome in Table D. Note that WaffleCLIP uses random strings as descriptors, making it unsuitable for this task. Descriptors generated by our method significantly outperform those from DCLIP, highlighting their superior quality.

| LLaMA-3.1 | IN1k         | IN1k-V2      | Caltech      | CIFAR        | CUB          | SAT           | Places       | Food         | Pets         | DTD          | Flowers      | Aircraft     | Cars         | Avg          |
|-----------|--------------|--------------|--------------|--------------|--------------|---------------|--------------|--------------|--------------|--------------|--------------|--------------|--------------|--------------|
| DCLIP     | 81.64        | 81.76        | 91.52        | 92.80        | 54.50        | 90.00         | <b>90.47</b> | 91.09        | 63.24        | 69.79        | 74.90        | 64.86        | 79.69        | 78.94        |
| Ours      | <b>92.34</b> | <b>90.76</b> | <b>98.21</b> | <b>96.00</b> | <b>85.60</b> | <b>100.00</b> | 90.14        | <b>96.63</b> | <b>91.89</b> | <b>94.47</b> | <b>89.61</b> | <b>99.43</b> | <b>96.63</b> | <b>93.98</b> |

Table D. Question-answering accuracy (%) evaluated using LLaMA-3.1-8B-instruct.

## D. Experimental results with high-level concepts

We show the classification results with high-level concepts, proposed in WaffleCLIP, in Table E. Note that we exclude datasets with more than one high-level concept, as in WaffleCLIP; for example, ImageNet (IN1k) is excluded because it contains many different kinds of objects, animals, food, etc. As shown in the results, our method consistently outperforms the baselines.

| ViT-B/32                             | CUB   | SAT   | Places | Food  | Pets  | DTD   | Flowers | Aircraft | Cars  | Avg   |
|--------------------------------------|-------|-------|--------|-------|-------|-------|---------|----------|-------|-------|
| CLIP + Concepts                      | 52.12 | 40.09 | 39.30  | 84.67 | 86.81 | 42.71 | 64.37   | 26.94    | 59.37 | 55.15 |
| DCLIP + Concepts                     | 53.61 | 48.13 | 41.71  | 84.56 | 89.26 | 43.35 | 69.10   | 28.08    | 59.45 | 57.47 |
| WaffleCLIP + Concepts                | 52.83 | 48.58 | 41.02  | 84.91 | 88.29 | 42.32 | 67.21   | 28.35    | 59.67 | 57.02 |
| WaffleCLIP + Concepts + DCLIP descr. | 53.25 | 48.67 | 41.82  | 85.00 | 88.58 | 43.93 | 68.19   | 28.56    | 59.77 | 57.53 |
| Ours + Concepts                      | 53.81 | 51.40 | 42.24  | 84.92 | 88.88 | 44.63 | 68.50   | 29.43    | 59.77 | 58.18 |
| Ours + Filtering + Concepts          | 56.22 | 58.40 | 44.38  | 85.14 | 87.11 | 51.11 | 73.89   | 29.02    | 59.39 | 60.52 |

Table E. Image classification accuracy (%) with high-level concepts.

## E. Inference Time

Our method introduces additional steps beyond the baselines, raising concerns about inference time. To address this, we measure inference time, which remains nearly identical across methods since actual classification uses pre-generated descriptors. We define inference time as the duration of steps before classification. Since descriptor generation with the large language model is shared by both methods and varies in API response time, we exclude it from the calculation, along with the one-time model load time (~2.3 seconds). We measure the additional inference time required by our steps—identifying similar classes and filtering—compared to the baseline, as shown in Table F. The increase in time is minimal relative to performance gains. This experiment, conducted on a single RTX 3090 GPU, has room for runtime optimization, suggesting potential further reductions in time.

| ViT-B/32  | IN1k  | IN1k-V2 | Caltech | CIFAR | CUB  | SAT  | Places | Food | Pets | DTD  | Flowers | Aircraft | Cars |
|-----------|-------|---------|---------|-------|------|------|--------|------|------|------|---------|----------|------|
| Similar   | 0.29  | 0.29    | 0.07    | 0.03  | 0.05 | 0.01 | 0.10   | 0.03 | 0.01 | 0.01 | 0.03    | 0.02     | 0.06 |
| Filtering | 28.93 | 29.07   | 7.27    | 3.23  | 5.89 | 0.71 | 14.14  | 3.12 | 1.49 | 1.41 | 3.04    | 2.43     | 7.03 |

Table F. The measured inference time (s). “Identifying similar classes” is denoted as “Similar”.

## F. Qualitative Results

We present the qualitative results in Table G to show the quality of the descriptors generated by our method and DCLIP. Our method minimizes features that are difficult for VLMs to leverage (e.g. numerical information) and provides more detail.

| Dataset        | Class                                        | Ours                                                                                                                                                                                                                                                                                | DCLIP                                                                                                                                                                                                                       |
|----------------|----------------------------------------------|-------------------------------------------------------------------------------------------------------------------------------------------------------------------------------------------------------------------------------------------------------------------------------------|-----------------------------------------------------------------------------------------------------------------------------------------------------------------------------------------------------------------------------|
| IN1k & IN1k-V2 | drumstick                                    | narrow, cylindrical shape<br>rounded tip for striking surfaces<br>long, slender wooden or plastic shaft<br>tapered end or tip designed for striking<br>uniform thickness along most of its length                                                                                   | smooth surface<br>cylindrical shape<br>often found in pairs<br>relatively lightweight<br>length approximately 15-18 inches (varies)                                                                                         |
| Caltech        | golf-ball                                    | dimpled texture<br>Small, spherical shape<br>Perfectly round shape without stitching<br>solid white or occasionally other solid colors<br>Presence on a grassy or golf-course background                                                                                            | small, spherical object<br>typically white or sometimes colored<br>covered in dimples (small indentations)<br>may have brand names or logos printed on it<br>standard size approximately 1.68 inches (42.67 mm) in diameter |
| CIFAR          | house                                        | Garage or driveway<br>Surrounding lawn or garden<br>Driveway or pathway leading to an entrance<br>Residential surroundings such as nearby houses or streets<br>Residential design and materials (e.g., brick, wood, or siding)                                                      | garage (optional)<br>a chimney (optional)<br>a building structure<br>windows with glass panes<br>eaves or gutters along the roofline                                                                                        |
| CUB            | Downy Woodpecker                             | Vertical clinging posture on trees<br>Long, chisel-like bill for pecking wood<br>Black and white checkered pattern on wings<br>Relatively small, pointed beak designed for pecking wood<br>Short and stiff tail feathers used for support against tree trunks                       | White underparts<br>Black and white plumage<br>Black wings with white spots<br>Black and white striped head<br>Small size, about 6-7 inches in length                                                                       |
| SAT            | residential buildings or homes or apartments | Balconies or patios with furniture or plants<br>Fences or boundaries surrounding the property<br>Personal vehicles like cars or bicycles parked outside<br>Urban or suburban layout with interconnected structures<br>Presence of driveways and parking areas adjacent to buildings | doors<br>a roof<br>windows<br>chimneys<br>balconies or porches                                                                                                                                                              |
| Places         | picnic_area                                  | picnic tables<br>grills or barbecues<br>Wooden or metal picnic tables<br>shade structures (e.g., pavilions or gazebos)<br>recreational equipment like frisbees or balls                                                                                                             | Trash bins<br>Open grassy areas<br>Trees or natural shade<br>Signs indicating picnic areas<br>People sitting or eating outdoors                                                                                             |
| Food           | peking duck                                  | sliced duck meat<br>whole roasted duck<br>crispy, caramelized skin<br>thin pancakes or steamed buns for wrapping<br>garnished with sliced cucumbers and scallions                                                                                                                   | Orange bill<br>White plumage<br>Rounded body shape<br>Orange legs and webbed feet<br>Garnished with sliced cucumbers and green onions                                                                                       |
| Pets           | havanese                                     | Dropped ears<br>small, sturdy build<br>Longer, wavy or curly coat<br>longer ears that hang down, covered in long fur<br>Tightly curled tail that often arches over the back                                                                                                         | floppy ears<br>small breed dog<br>long, wavy or curly coat<br>friendly and alert expression<br>sturdy body with a height ranging from 8.5 to 11.5 inches                                                                    |
| DTD            | striped                                      | parallel lines<br>no intersecting lines<br>lines of consistent color<br>Consistent direction of lines<br>uniform spacing between lines                                                                                                                                              | It seems there might be a typo in your request.<br>"Striped" is an adjective and needs a noun to be complete (e.g., striped shirt, striped animal).<br>Could you please clarify what you are referring to with "striped"?   |
| Flowers        | fritillary                                   | downward-facing blooms<br>narrow, lance-shaped leaves<br>checkered or spotted floral patterns<br>Distinctive pattern on the wings (if a butterfly)<br>Bell-shaped, downward-facing flowers (if a flower)                                                                            | butterfly or moth<br>lance-shaped or linear leaves<br>checkered or spotted underwings<br>proboscis for feeding on nectar or other fluids<br>wings often patterned with black spots or stripes                               |
| Aircraft       | Cessna 172                                   | Fixed landing gear<br>Four-seat configuration<br>Smaller tail and horizontal stabilizers<br>single engine with a propeller in the front<br>Enclosed cockpit with side-by-side seating                                                                                               | fixed landing gear<br>four-seat configuration<br>windows along the fuselage<br>small, single-engine aircraft<br>tricycle landing gear with a nose wheel                                                                     |
| Cars           | Chevrolet TrailBlazer SS 2009                | SUV body style<br>Lower, sportier stance<br>SS badging on the grille and rear<br>Integrated front bumper with fog lights<br>Signature bowtie emblem on the front grille                                                                                                             | SUV body style<br>20-inch aluminum wheels<br>Wide, aggressive stance<br>6.0-liter V8 engine visible if the hood is open<br>Interior features such as sport seats and specific SS embroidery                                 |

Table G. Qualitative results for all evaluated datasets. Since IN1k and IN1k-V2 have the same class, we mark them as the same.
